# Supplementary material for: New fluorescent pH sensors based on covalently linkable PET rhodamines
Source: PubMed Central journal article supplement — Talanta. 2012 Sep 15;99(2-3):194–201. doi: 10.1016/j.talanta.2012.05.039 (PMC3484401; doi:10.1016/j.talanta.2012.05.039), 2012-09-15
Supplement: mmc1.pdf [file mmc1.pdf]

Electronic Supplementary Information

## New fluorescent pH optrodes based on covalently linkable PET rhodamines.

Daniel Aigner<sup>a</sup>, Sergey M. Borisov<sup>a,\*</sup>, Francisco J. Orriach Fernández<sup>b</sup>, Jorge F. Fernández Sánchez<sup>b</sup>, Robert Saf<sup>c</sup> and Ingo Klimant<sup>a</sup>

<sup>a</sup>Institute of Analytical Chemistry and Food Chemistry, Graz University of Technology, Stremayrgasse 9, A-8010 Graz, Austria

<sup>b</sup>Environmental, Biochemical and Foodstuffs Analytical Control Research Group, Universidad de Granada, Campus de Fuentenueva, E-18071 Granada, Spain

<sup>c</sup>Institute for Chemistry and Technology of Materials, Graz University of Technology, Stremayrgasse 9, A-8010 Graz, Austria

\*Corresponding author. Tel.: +4331687332516; Fax.: +4331687332502; E-Mail.: [sergey.borisov@tugraz.at](mailto:sergey.borisov@tugraz.at)

## UV/Vis spectra

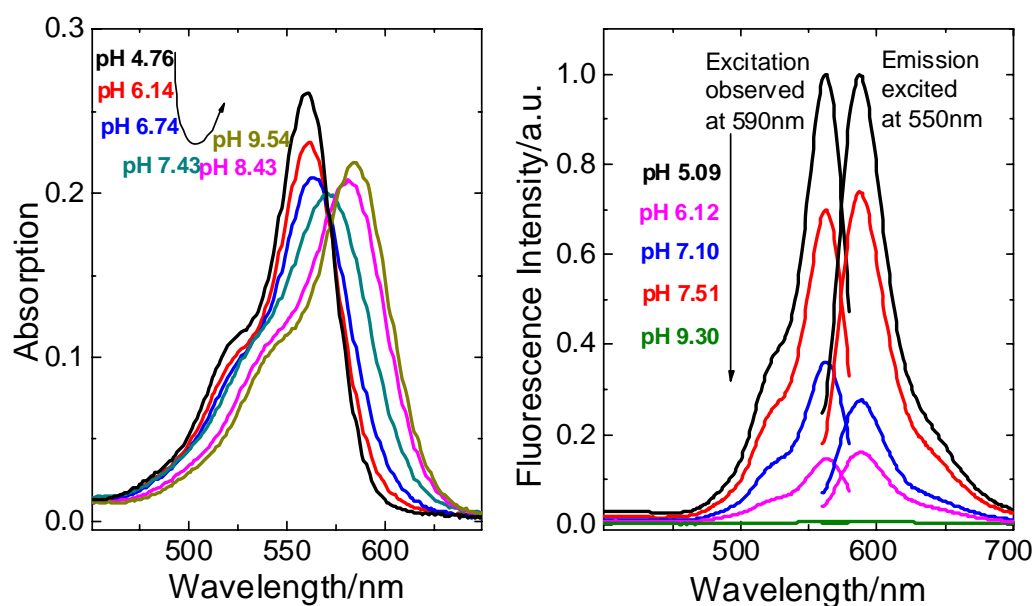

Figure S1: Absorption spectra (left) and fluorescence spectra (right) of **2** in aqueous buffer solution (ionic strength 100mM) at different pH. Dye concentration was  $2\mu\text{M}$  when recording absorption and  $0.05\mu\text{M}$  when recording fluorescence spectra.

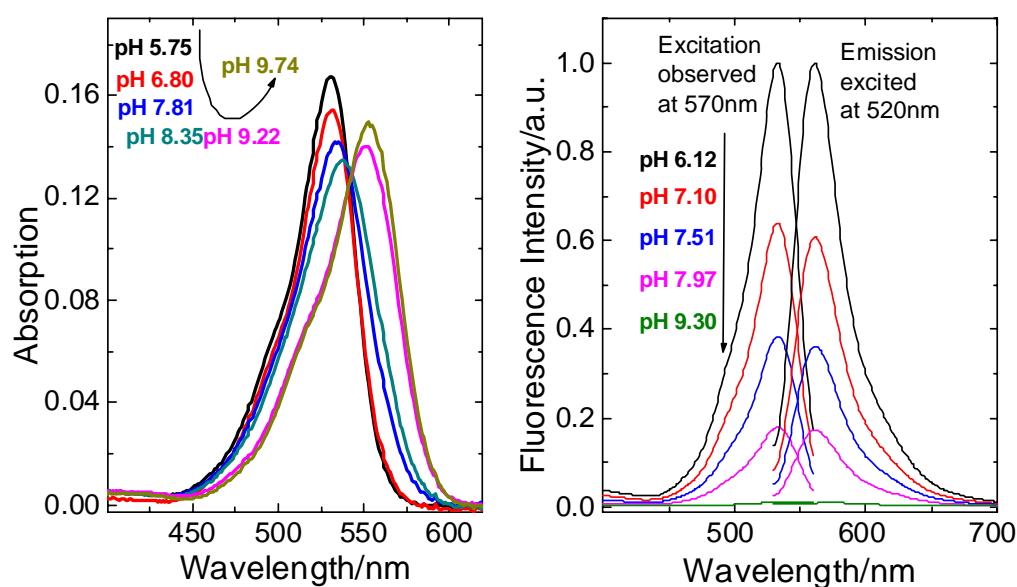

Figure S2: Absorption spectra (left) and fluorescence spectra (right) of **3** in aqueous buffer solution (ionic strength 100mM) at different pH. Dye concentration was  $2\mu\text{M}$  when recording absorption and  $0.05\mu\text{M}$  when recording fluorescence spectra.

## Sensor response curves

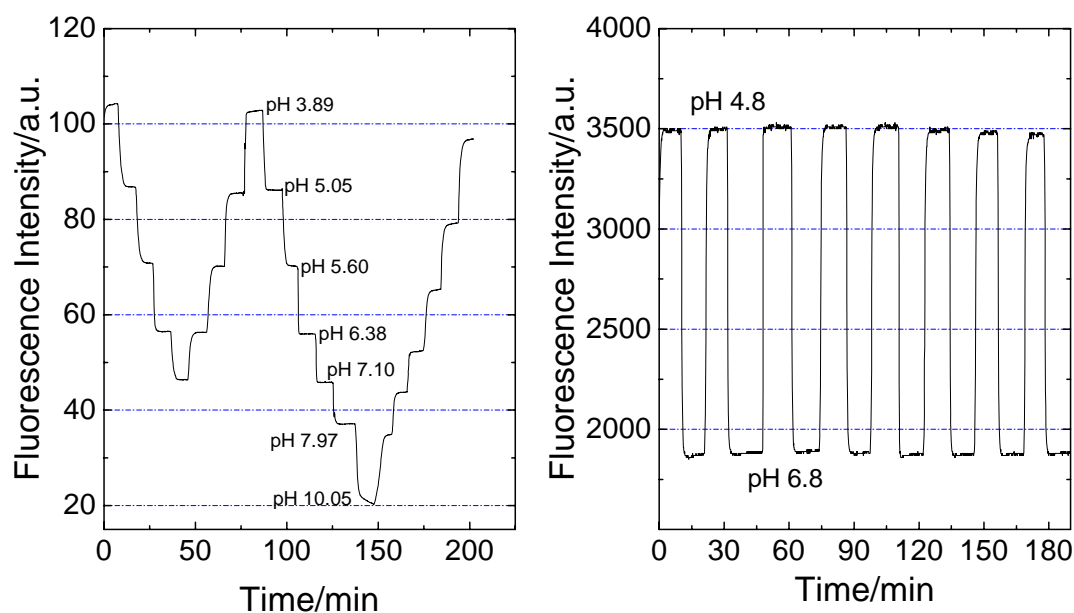

Figure S3: Reversibility and repeatability of the sensor based on silica gel beads in D4<sup>®</sup> hydrogel. Signal drift and irreversible response are only observed at high pH values (>8) which are essentially outside the sensitive range.

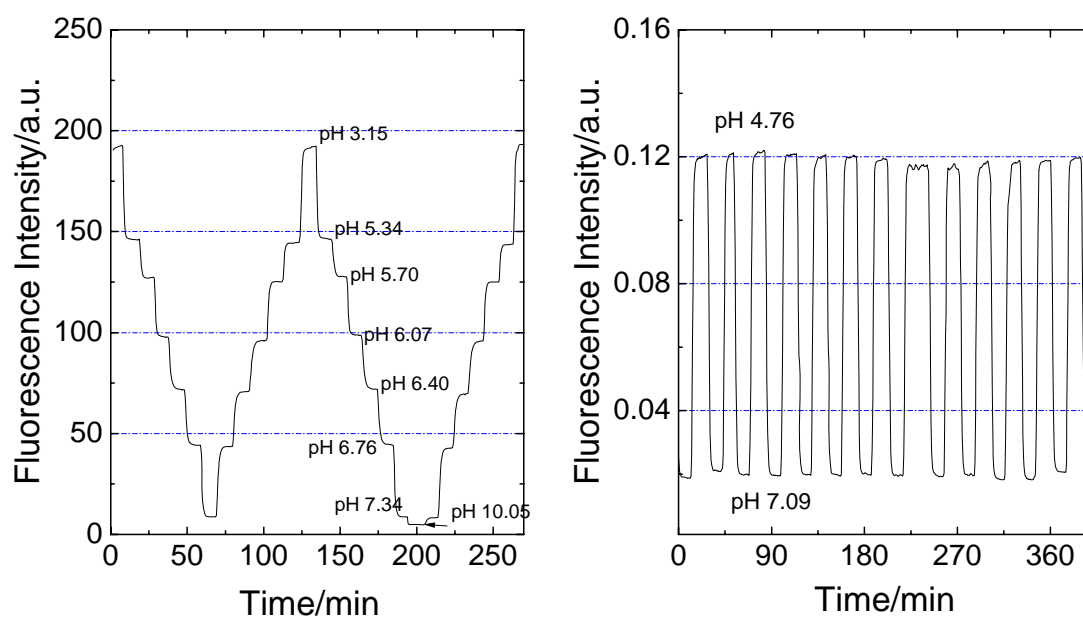

Figure S4: Reversibility and repeatability of the sensor based on cross-linked poly(HEMA) beads linear poly(HEMA). They are good over the whole investigated pH range (pH 3-10).

## Calibration

The following sigmoidal function was used for sensor calibration:

$$I = \frac{A_{\min} - A_{\max}}{1 + e^{(pH - pK_a)/dx}} + A_{\max}, \quad (\text{Equation 1})$$

where  $I$  - fluorescence intensity,  $A_{\max}$ ,  $A_{\min}$ ,  $pK_a$  and  $dx$  are numerical coefficients.

## NMR spectra

## Compound 1

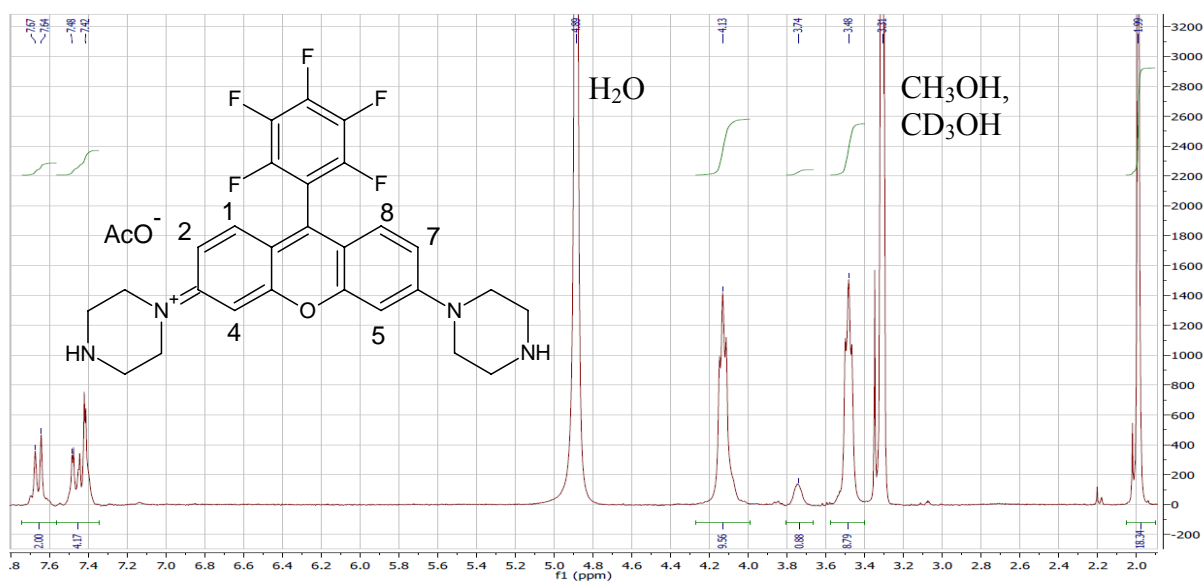

Figure S5: <sup>1</sup>H-NMR spectrum of **1** in CD<sub>3</sub>OD (ppm) containing 0.1% HOAc and 0.1% CF<sub>3</sub>COOH. Before addition of HOAc the integral of acetate hydrogen (1.99ppm) was 2.9 (spectrum not shown here).  $\delta = 7.65$ ppm (2H, d, Ar-H(positions 1,8),  $J_{\text{ArH}12,78} = 9.6$  Hz);  $\delta = 7.46$  (2H, dd, Ar-H(2,7),  $J_{\text{ArH}24,57} = 2.5$  Hz);  $\delta = 7.42$  (2H, d, Ar-H(4,5));  $\delta = 4.13$  (8H, t, ArNCH<sub>2</sub>,  $J = 5.2$  Hz);  $\delta = 3.48$  (8H, t, HNCH<sub>2</sub>);  $\delta = 1.99$  (3H, s, H<sub>acetate</sub>).

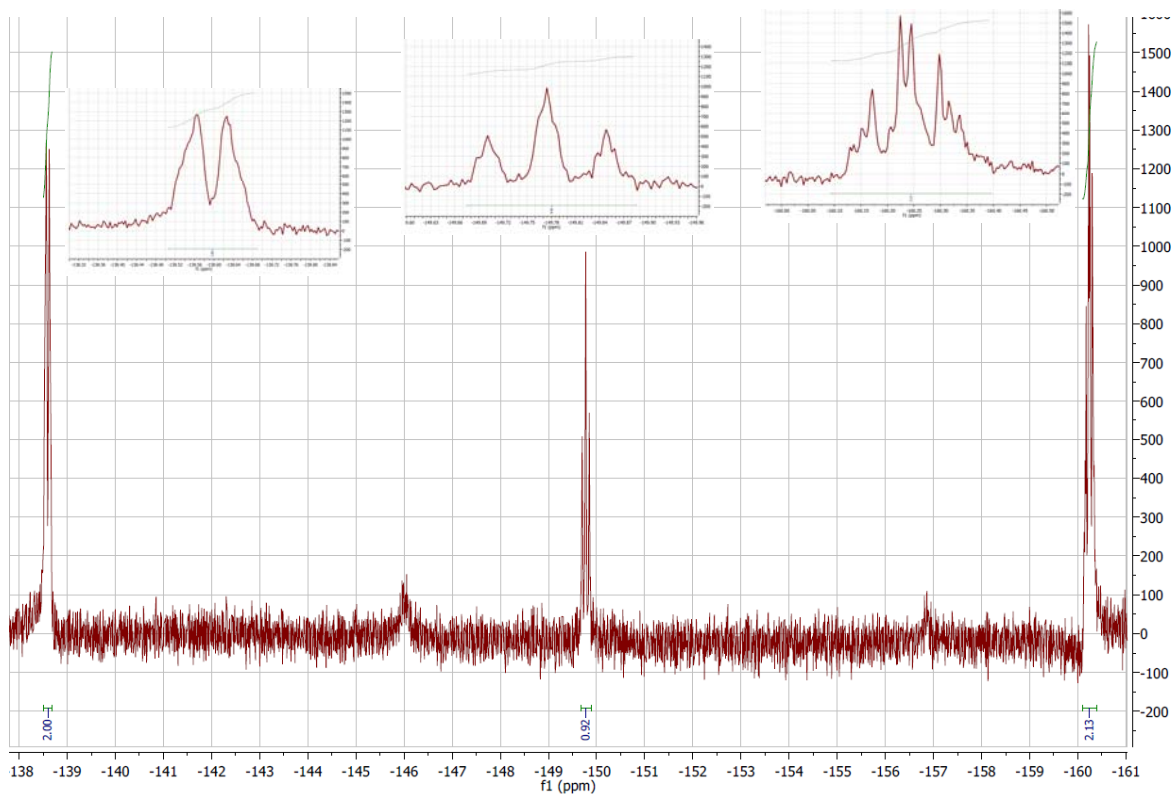

**Figure S6: <sup>19</sup>F-NMR spectrum of **1**.  $\delta = -139$ ppm (2F, d,  $J = 20$  Hz);  $\delta = -150$  (1F, t,  $J = 21$  Hz);  $\delta = -160$  (2F, dt,  $J_1 = 6$  Hz,  $J_2 = 21$  Hz).**

## Compound 2

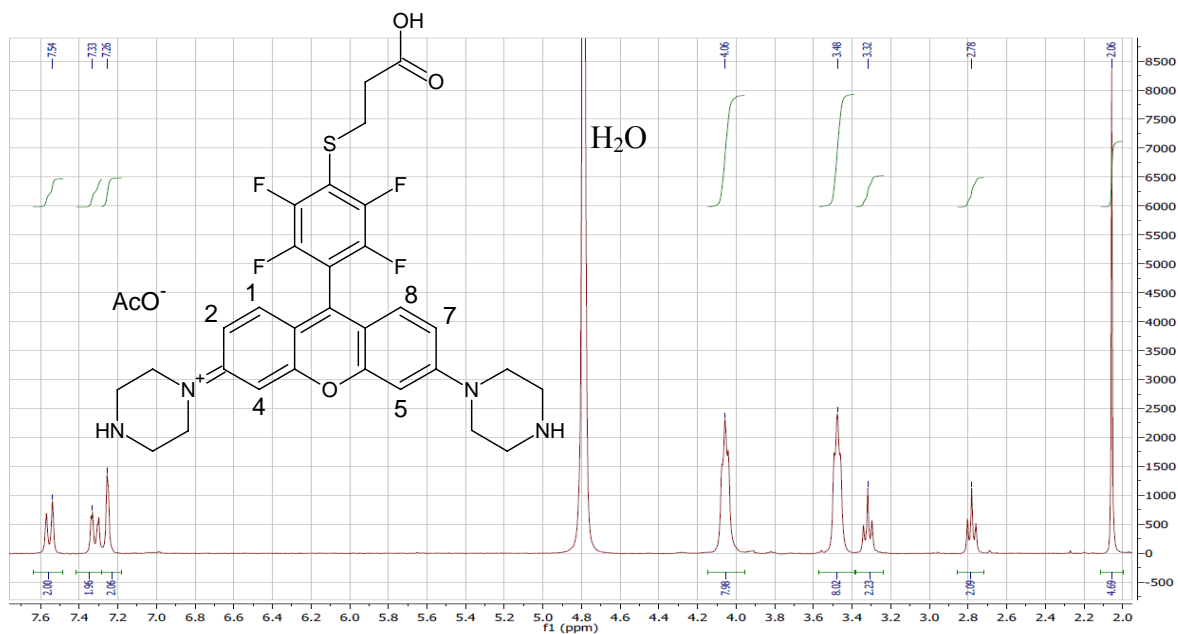

Figure S7:  $^1\text{H}$ -NMR spectrum of **2** in  $\text{D}_2\text{O}$  containing 0.1%  $\text{CF}_3\text{COOH}$ .  $\delta = 7.55\text{ppm}$  (2H, d, Ar-H(positions 1,8),  $J_{\text{ArH}12,78} = 9.6\text{ Hz}$ );  $\delta = 7.32$  (2H, dd, Ar-H(2,7),  $J_{\text{ArH}24,57} = 2.3\text{ Hz}$ );  $\delta = 7.26$  (2H, d, Ar-H(4,5));  $\delta = 4.06$  (8H, t, ArNCH<sub>2</sub>,  $J = 4.9\text{ Hz}$ );  $\delta = 3.48$  (8H, t, HNCH<sub>2</sub>);  $\delta = 3.32$  (2H, t, ArSCH<sub>2</sub>,  $J = 6.7\text{ Hz}$ );  $\delta = 2.76$  (2H, t, CH<sub>2</sub>COOH);  $\delta = 2.06$  (4.7H, s, H<sub>acetate</sub>).

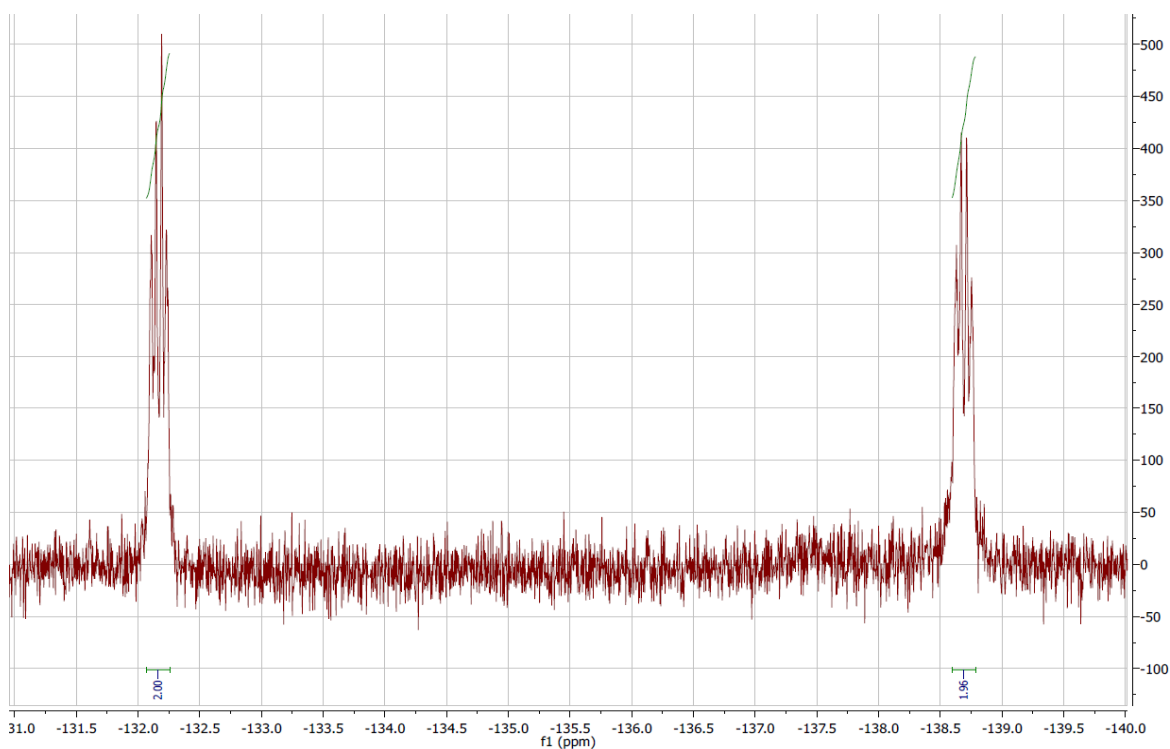

**Figure S8:  $^{19}\text{F}$ -NMR spectrum of **2**.  $\delta = -132\text{ppm}$  (2F, q,  $J = 11\text{ Hz}$ );  $\delta = -139$  (2F, q,  $J = 11\text{ Hz}$ ).**

## Compound 3

Compound **3** could be identified as the pure 4'-carboxy regioisomer (figure S9). For comparison, the spectrum of the 5'-carboxy regioisomer (figure S10), which was also obtained upon HPLC purification of crude **3**, is shown. Resonance at >7.9ppm is can be attributed to the protons in the dicarboxyphenyl ring which are in ortho-position to a carboxy group. The 4'-isomer contains only two such protons, while three can be found for the 5'-isomer.

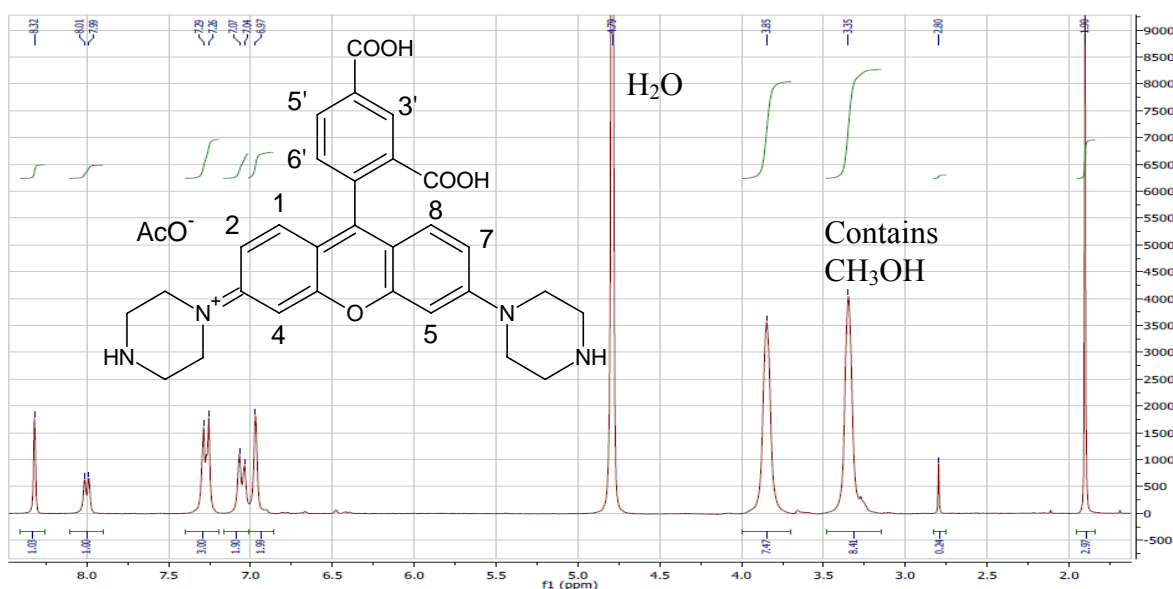

Figure S9:  $^1\text{H-NMR}$  spectrum of **3** (4'-carboxy regioisomer) in  $\text{D}_2\text{O}$ .  $\delta = 8.32\text{ppm}$  (1H, s, Ar-H(position 3'));  $\delta = 8.00$  (1H, d, Ar-H(5'),  $J_{\text{ArH}5'6'} = 7.5$  Hz);  $\delta = 7.27$  (3H, d, Ar-H(6', 1, 8),  $J_{\text{ArH}12,78} = 9.3$  Hz);  $\delta = 7.06$  (2H, d, Ar-H(2, 7));  $\delta = 6.97$  (2H, s, Ar-H(4, 5));  $\delta = 3.85$  (8H, broad s,  $\text{ArNCH}_2$ );  $\delta = 3.35$  (8H, broad s,  $\text{HNCH}_2$ );  $\delta = 1.90$  (3H, s,  $\text{H}_{\text{acetate}}$ ).

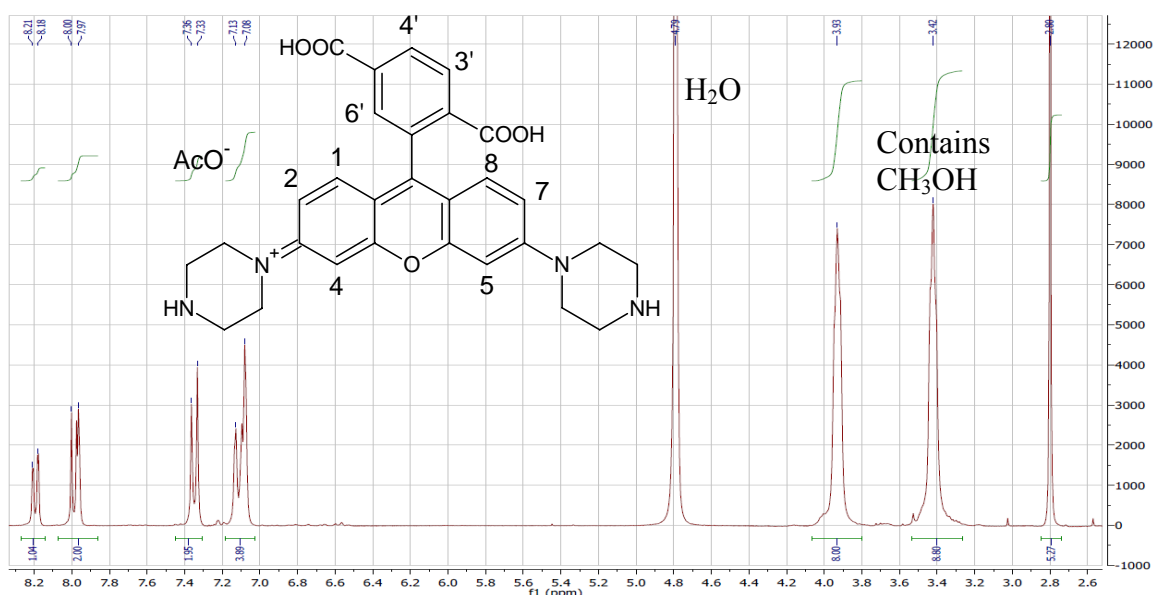

Figure S10:  $^1\text{H-NMR}$  spectrum of the 5'-carboxy regioisomer to **3** in  $\text{D}_2\text{O}$ .  $\delta = 8.20$  (1H, dd, Ar-H(4'),  $J_{\text{ArH}3'4'} = 8.1\text{Hz}$ ,  $J_{\text{ArH}4'6'} = 1.7$  Hz);  $\delta = 7.99$  (1H, d, Ar-H(3'));  $\delta = 7.97$  (1H, d, Ar-H(6'));  $\delta = 7.35$  (2H, dd, Ar-H(1, 8),  $J_{\text{ArH}12,78} = 9.4$  Hz,  $J_{\text{ArH}24,57} = 1.6$  Hz);  $\delta = 7.11$  (2H, d, Ar-H(2, 7));  $\delta = 7.08$  (2H, d, Ar-H(4, 5));  $\delta = 3.93$  (8H, t,  $\text{ArNCH}_2$ ,  $J = 4.6$  Hz);  $\delta = 3.42$  (8H, t,  $\text{HNCH}_2$ );  $\delta = 2.80$  (5.3H, s,  $\text{H}_{\text{acetate}}$ ).

LC-MS measurements:

Compound **1** after HPLC purification

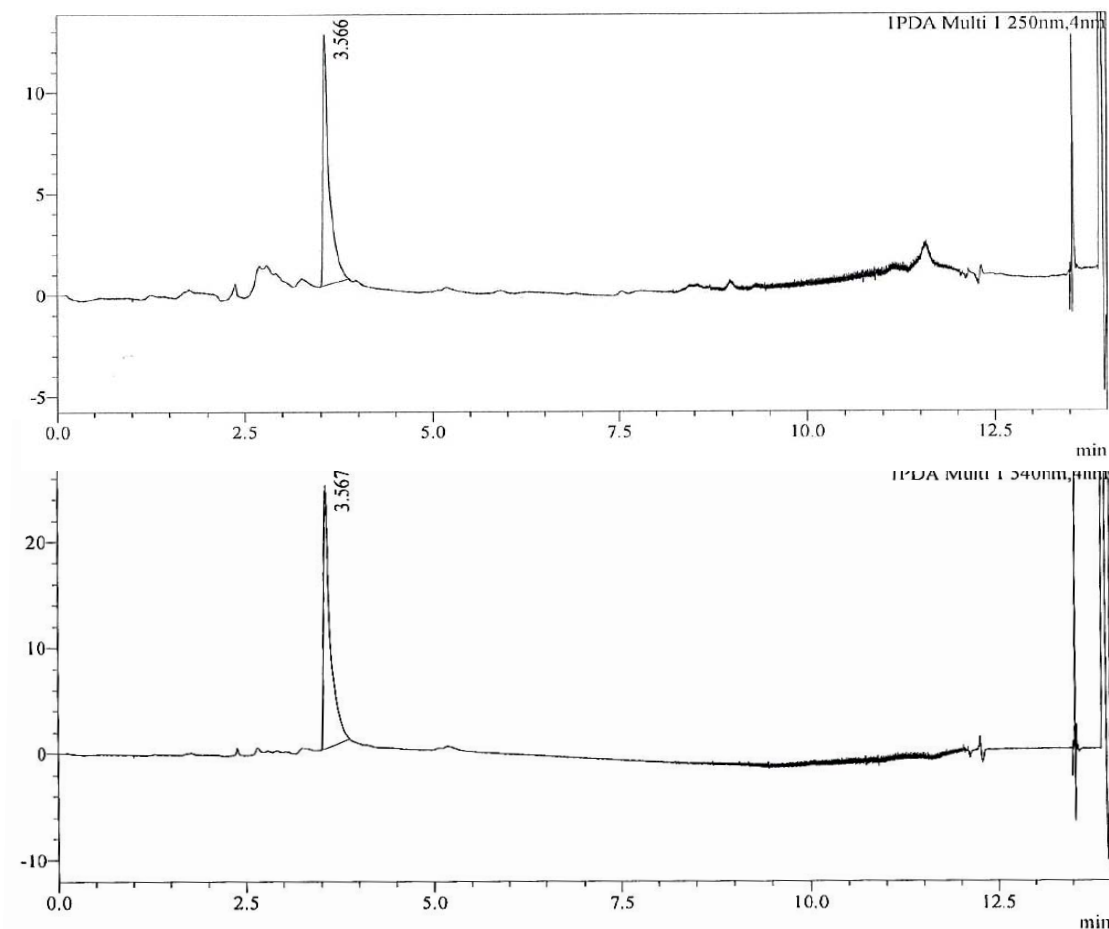

Figure S11: Chromatogram of **1** after HPLC purification, recorded with an UV/VIS detector set to 250nm (top) and 540nm (bottom), bandwidth 4nm each.

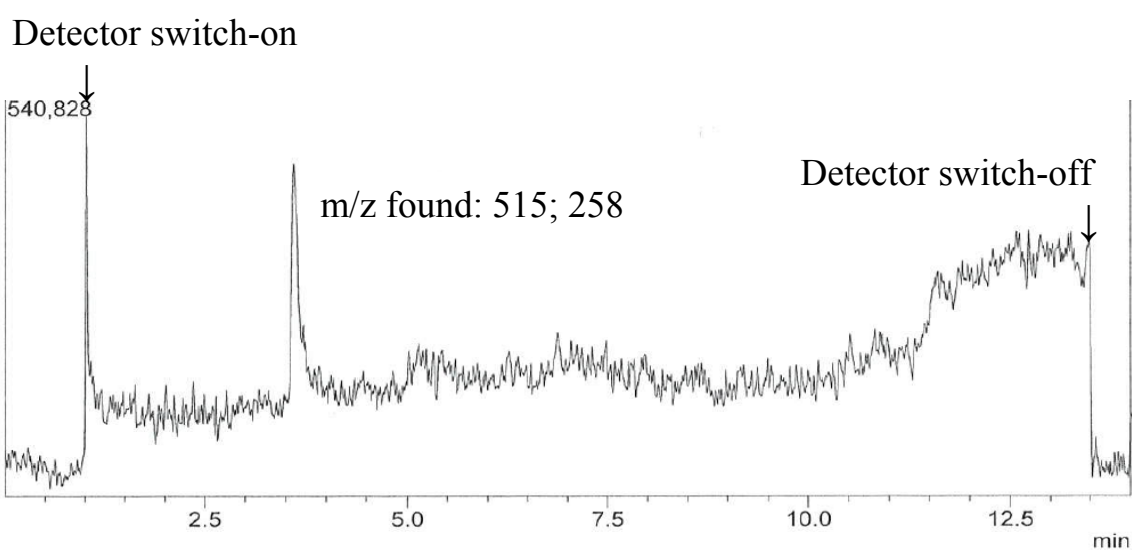

Figure S12: Total ion current chromatogram of **1** after HPLC purification, recorded with an ESI-quadruple MS detector.

## Compound 1 (crude)

LC-MS characterisation of crude **1** reveals an interesting side-product which shows a slightly higher mass than the main product but no absorption typical for rhodamines. This could be the product of a reduction (formal addition of H<sup>+</sup> to the chinoid form of the rhodamine) which results in disruption of the xantheno chromophore.

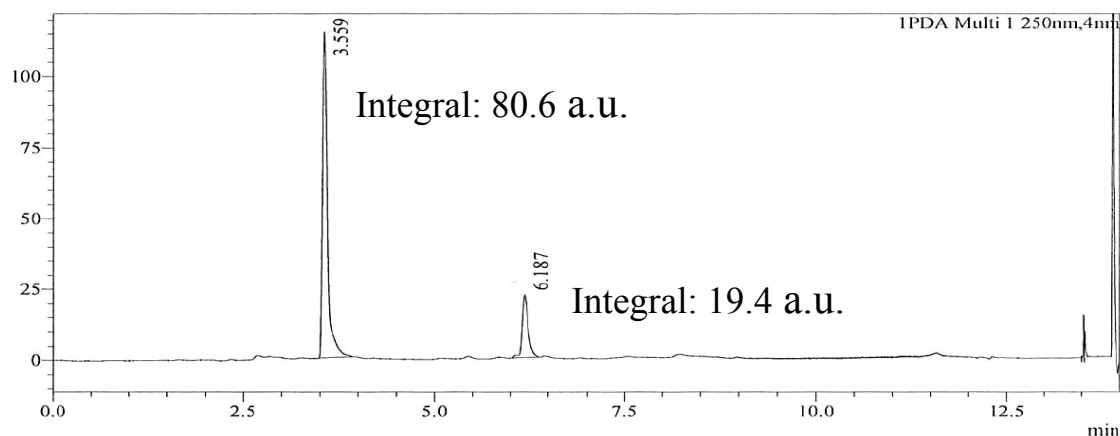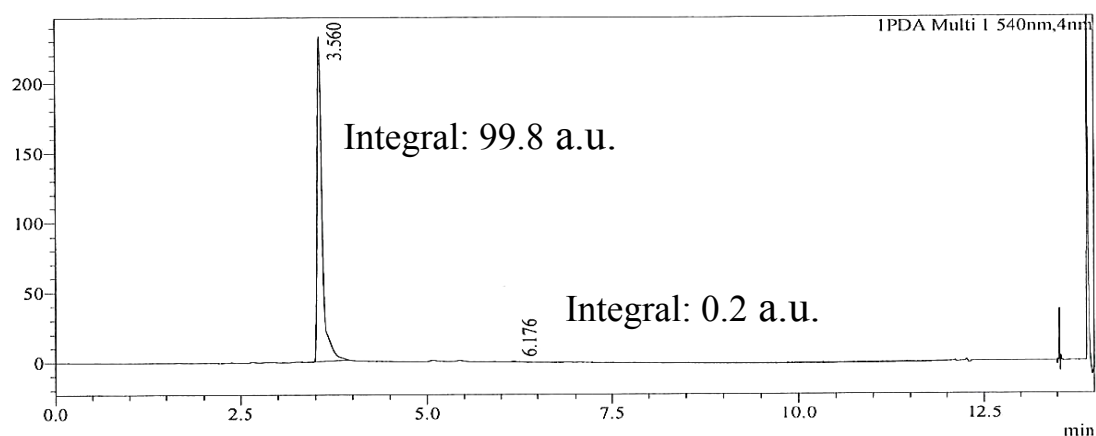

Figure S13: Chromatogram of crude **1**, recorded with an UV/VIS detector set to 250nm (top) and 540nm (bottom), bandwidth 4nm each.

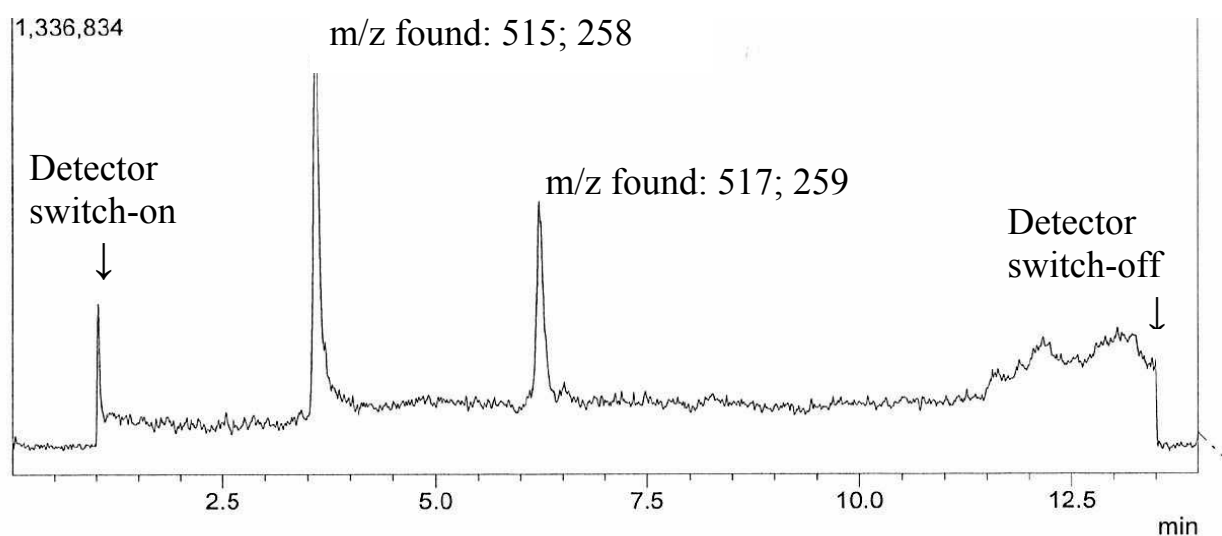

Figure S14: Total ion current chromatogram of crude **1**, recorded with an ESI-quadrupole MS detector.



Compound **2** after HPLC purification

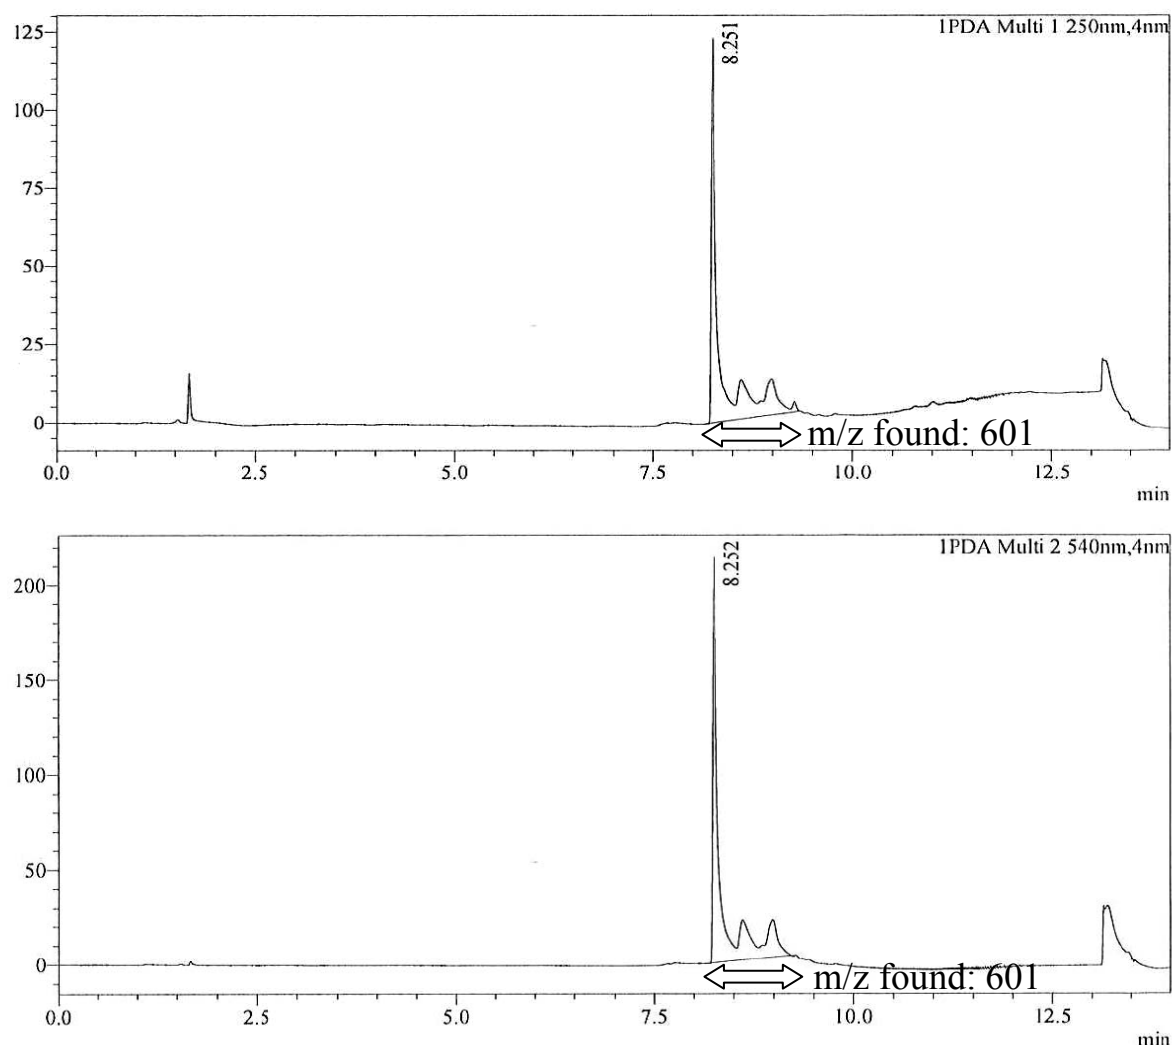

Figure S15: Chromatogram of **2** after HPLC purification, recorded with an UV/VIS detector set to 250nm (top) and 540nm (bottom), bandwidth 4nm each.  $m/z=601$  was found over the whole indicated time (ESI-quadruple MS detector).

Compound **3** after HPLC purification

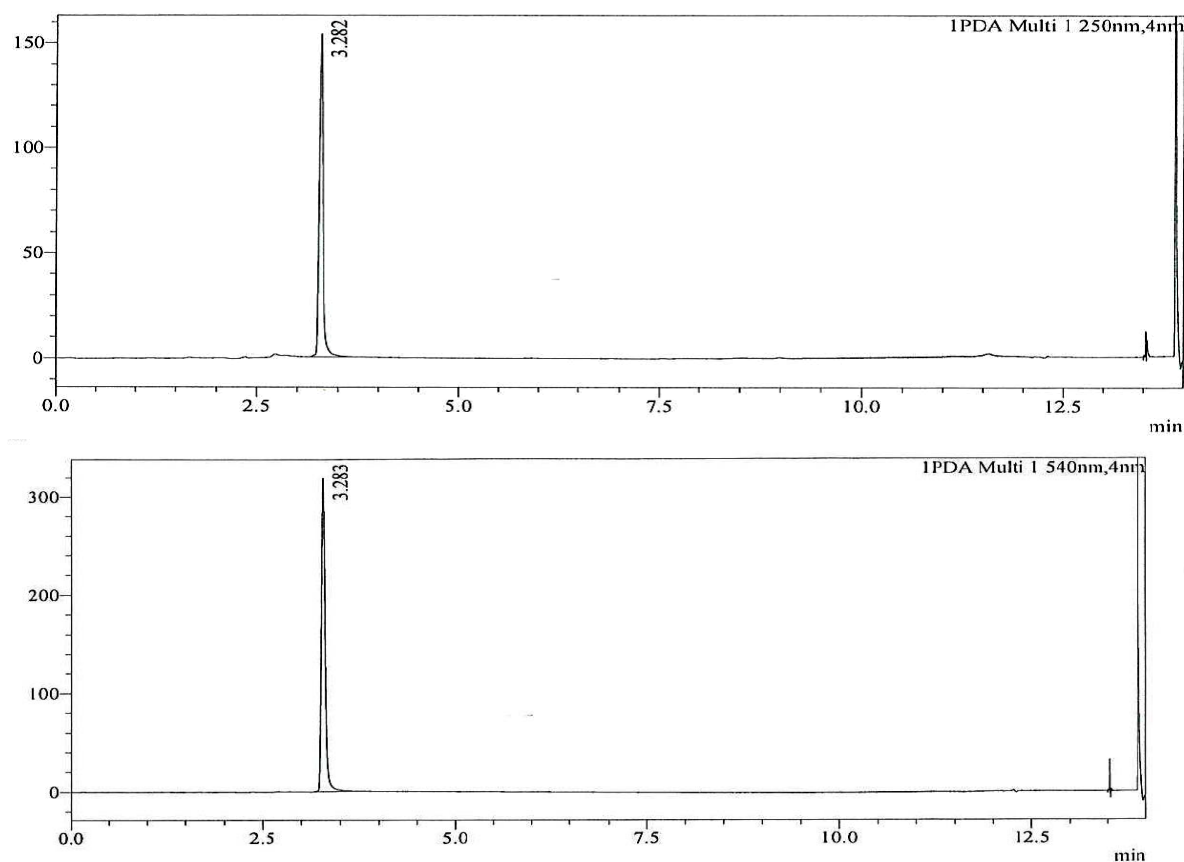

Figure S16: Chromatogram of **3** after HPLC purification, recorded with an UV/VIS detector set to 250nm (top) and 540nm (bottom), bandwidth 4nm each.

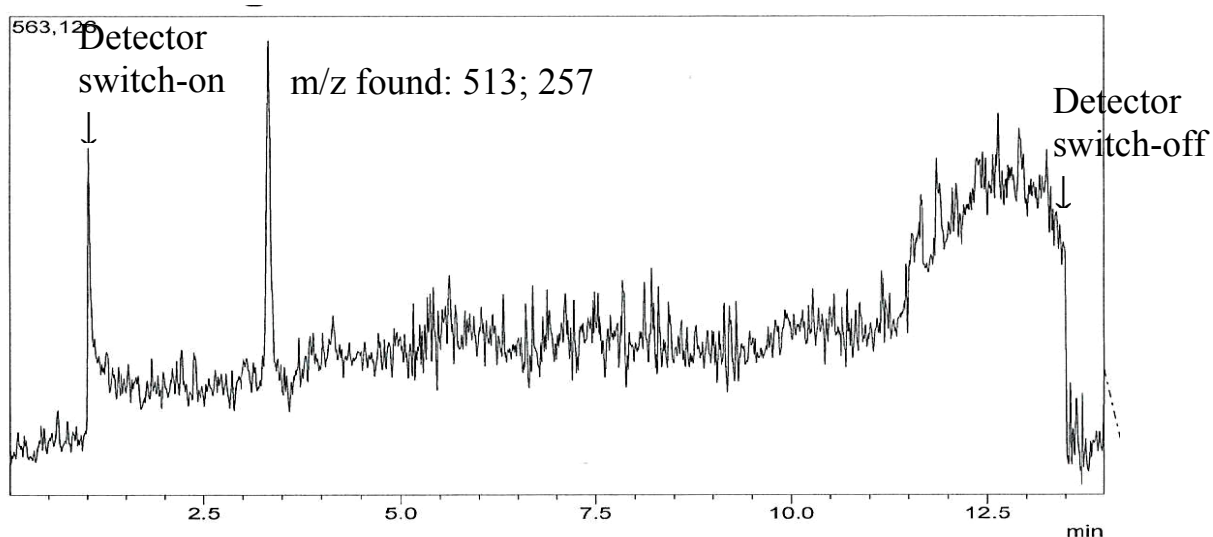

Figure S17: Total ion current chromatogram of **3** after HPLC purification, recorded with an ESI-quadruple MS detector.

### Compound 3 (crude)

LC-MS characterisation shows that crude **3** is composed of four different rhodamines which have been formed in an approximate ratio of 1:1:0.3:0.3. The two main components which are eluted earlier have been isolated and identified by NMR spectroscopy as the 5'-carboxy and the 4'-carboxy regioisomers of the target structure. The 4'-isomer (i.e. compound **3**) was used for characterisation. The two components eluted later have higher molecular masses and could be the result of methylation by methanesulfonic acid upon preparation.

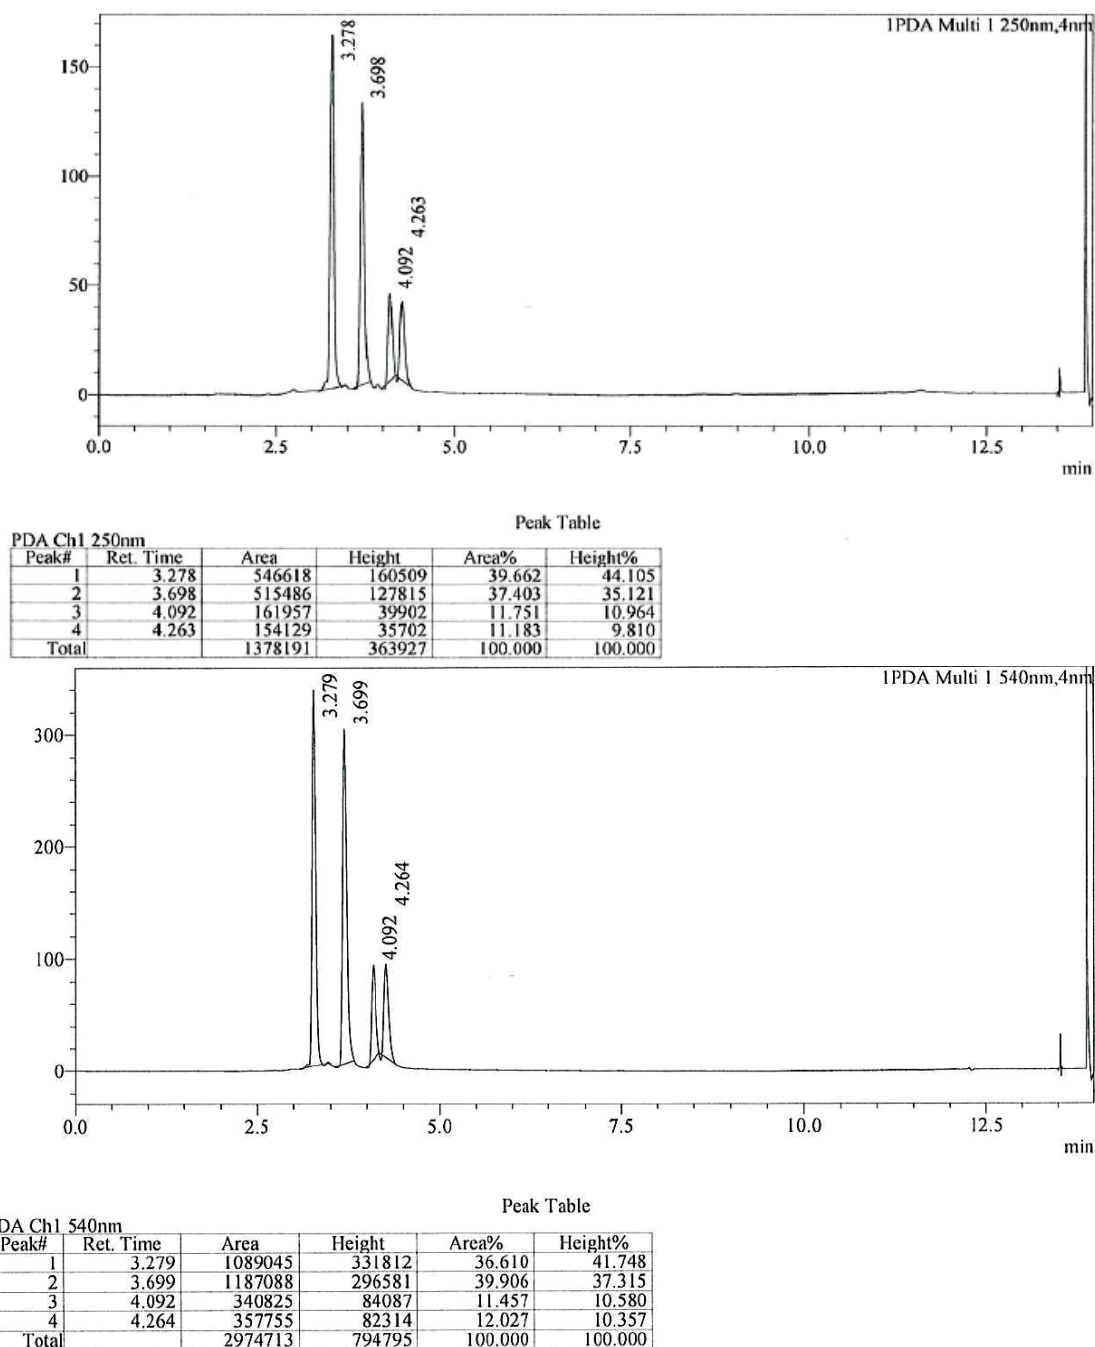

Figure S18: Chromatogram of crude **3**, recorded with an UV/VIS detector set to 250nm (top) and 540nm (bottom), bandwidth 4nm each. The corresponding peak integrals are listed in the peak tables.

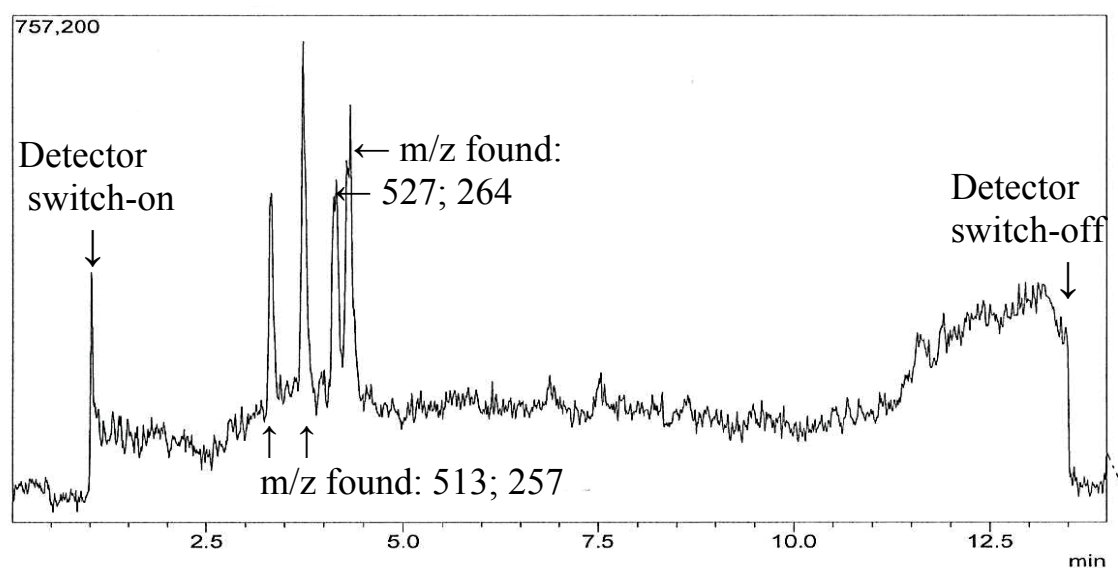

Figure S19: Total ion current chromatogram of crude **3**, recorded with an ESI-quadruple MS detector.

Gradients used for HPLC purification:

Table S1: HPLC gradient used for the purification of **1**.

| Time/min | Ratio MeOH/% | Ratio 0.1% aqueous HOAc/% | Flow rate/ml·min <sup>-1</sup> |
|----------|--------------|---------------------------|--------------------------------|
| 0        | 0            | 100                       | 4                              |
| 10       | 30           | 70                        | 4                              |
| 11       | 100          | 0                         | 4                              |
| 16       | 100          | 0                         | 4                              |
| 17       | 0            | 100                       | 4                              |
| 22       | 0            | 100                       | 4                              |

Table S2: HPLC gradient used for the purification of **2**.

| Time/min | Ratio MeOH/% | Ratio 0.1% aqueous HOAc/% | Flow rate/ml·min <sup>-1</sup> |
|----------|--------------|---------------------------|--------------------------------|
| 0        | 10           | 90                        | 16                             |
| 30       | 25           | 75                        | 16                             |
| 32       | 100          | 0                         | 16                             |
| 40       | 100          | 0                         | 16                             |

Table S3: HPLC gradient used for the purification of **3**.

| Time/min | Ratio MeOH/% | Ratio 0.1% aqueous HOAc/% | Flow rate/ml·min <sup>-1</sup> |
|----------|--------------|---------------------------|--------------------------------|
| 0        | 0            | 100                       | 4                              |
| 12       | 30           | 70                        | 4                              |
| 12.5     | 100          | 0                         | 4                              |
| 16.5     | 100          | 0                         | 4                              |
| 17       | 0            | 100                       | 4                              |
| 21       | 0            | 100                       | 4                              |

Gradient used for LC-MS characterisation

Table S4: Gradient used for LC-MS characterisation of **1-3**.

| Time/min | Ratio MeOH/% | Ratio 0.01% aqueous HCOOH/% | Flow rate/ml·min <sup>-1</sup> |
|----------|--------------|-----------------------------|--------------------------------|
| 0        | 2            | 98                          | 0.7                            |
| 5        | 2            | 98                          | 0.7                            |
| 10       | 100          | 0                           | 0.7                            |
| 12       | 100          | 0                           | 0.7                            |
| 13       | 2            | 98                          | 0.7                            |
